# Supplementary material for: New Marine Sterols from a Gorgonian Pinnigorgia sp
Source: PubMed Central journal article supplement (PMC6155433; doi:10.3390/molecules22030393), 2017-03-03
Supplement: molecules-22-00393-s001.pdf [file molecules-22-00393-s001.pdf]

## Supporting Information

### New Marine Sterols from a Gorgonian *Pinnigorgia* sp.

Yu-Chia Chang , Tsong-Long Hwang , Chih-Hua Chao , Ping-Jyun Sung \*

| No   | Content                                                                                            | page |
|------|----------------------------------------------------------------------------------------------------|------|
| S1.  | HRESIMS spectrum of compound <b>1</b> .                                                            | 2    |
| S2.  | <sup>1</sup> H NMR spectrum (400 MHz) of compound <b>1</b> in CDCl <sub>3</sub> .                  | 2    |
| S3.  | <sup>13</sup> C NMR spectrum (100 MHz) of compound <b>1</b> in CDCl <sub>3</sub> .                 | 3    |
| S4.  | gHSQC spectrum (400 MHz) of compound <b>1</b> in CDCl <sub>3</sub> .                               | 3    |
| S5.  | <sup>1</sup> H- <sup>1</sup> H COSY spectrum (400 MHz) of compound <b>1</b> in CDCl <sub>3</sub> . | 4    |
| S6.  | gHMBC spectrum (400 MHz) of compound <b>1</b> in CDCl <sub>3</sub> .                               | 4    |
| S7.  | NOESY spectrum (400 MHz) of compound <b>1</b> in CDCl <sub>3</sub> .                               | 5    |
| S8.  | HRESIMS spectrum of compound <b>2</b> .                                                            | 5    |
| S9.  | <sup>1</sup> H NMR spectrum (400 MHz) of compound <b>2</b> in CDCl <sub>3</sub> .                  | 6    |
| S10. | <sup>13</sup> C NMR spectrum (100 MHz) of compound <b>2</b> in CDCl <sub>3</sub> .                 | 6    |
| S11. | gHSQC spectrum (400 MHz) of compound <b>2</b> in CDCl <sub>3</sub> .                               | 7    |
| S12. | <sup>1</sup> H- <sup>1</sup> H COSY spectrum (400 MHz) of compound <b>2</b> in CDCl <sub>3</sub> . | 7    |
| S13. | gHMBC spectrum (400 MHz) of compound <b>2</b> in CDCl <sub>3</sub> .                               | 8    |
| S14. | NOESY spectrum (400 MHz) of compound <b>2</b> in CDCl <sub>3</sub> .                               | 8    |

## Mass Spectrum SmartFormula Report

### Analysis Info

Analysis Name D:\Data\2\2012PINEAM030502081206\_000002.d 12/9/2014 3:09:35 PM  
Method broadband first signal  
Sample Name 2012PinEA-M03-05-02-08-12-06 Instrument: FT-MS solarix  
Comment ESI Positive

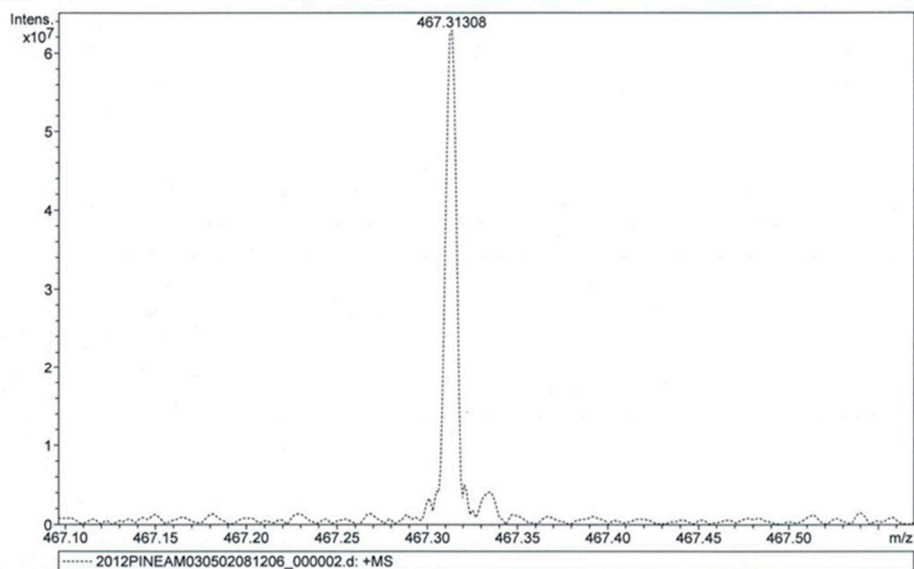

| Meas. m/z | # | Formula                                          | Score  | m/z       | err [mDa] | err [ppm] | mSigma | rdb | e <sup>-</sup> Conf | N-Rule |
|-----------|---|--------------------------------------------------|--------|-----------|-----------|-----------|--------|-----|---------------------|--------|
| 467.31308 | 1 | C <sub>28</sub> H <sub>44</sub> NaO <sub>4</sub> | 100.00 | 467.31318 | 0.11      | 0.23      | 31.0   | 6.5 | even                | ok     |

### S1. HRESIMS spectrum of compound 1.

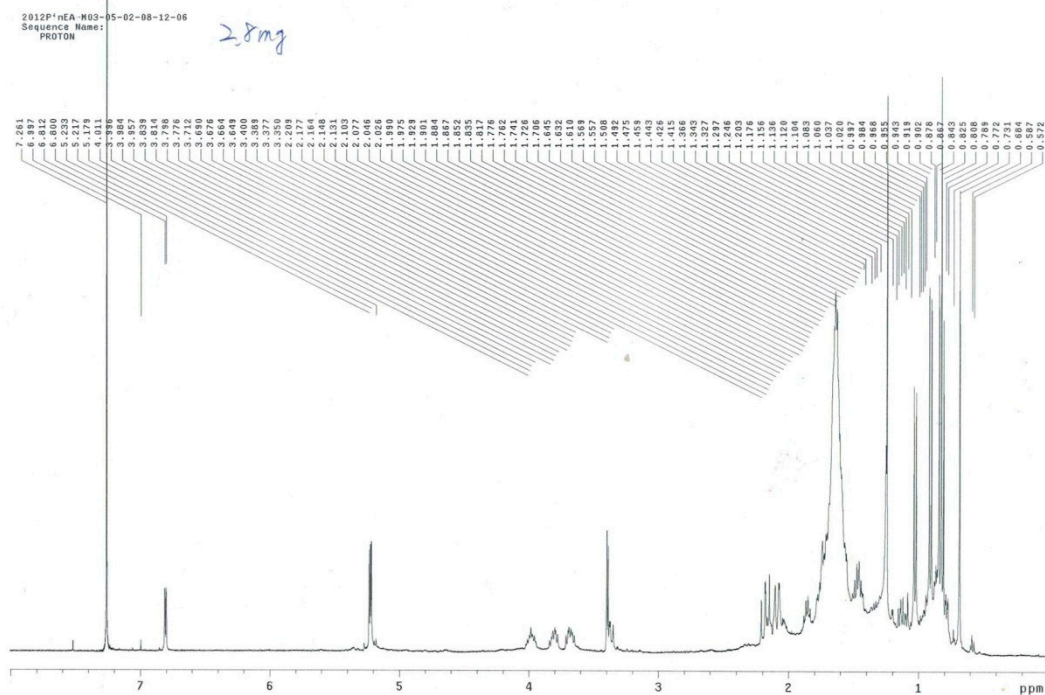

### S2. <sup>1</sup>H NMR spectrum (400 MHz) of compound 1 in CDCl<sub>3</sub>.

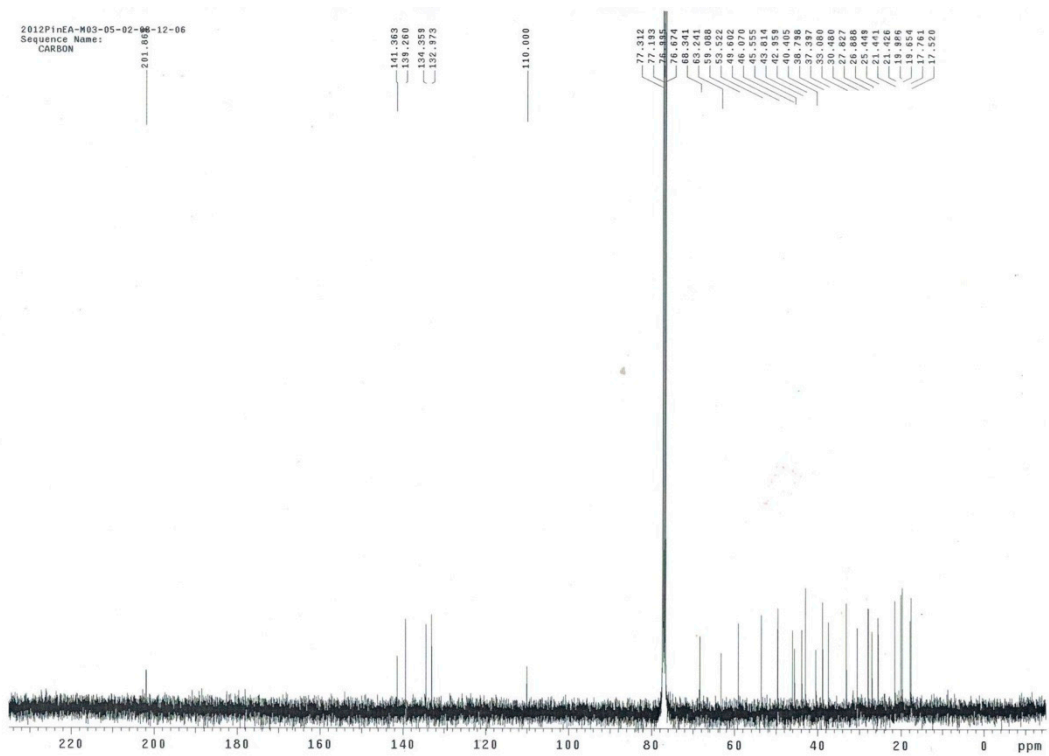

S3.  $^{13}\text{C}$  NMR spectrum (100 MHz) of compound **1** in  $\text{CDCl}_3$ .

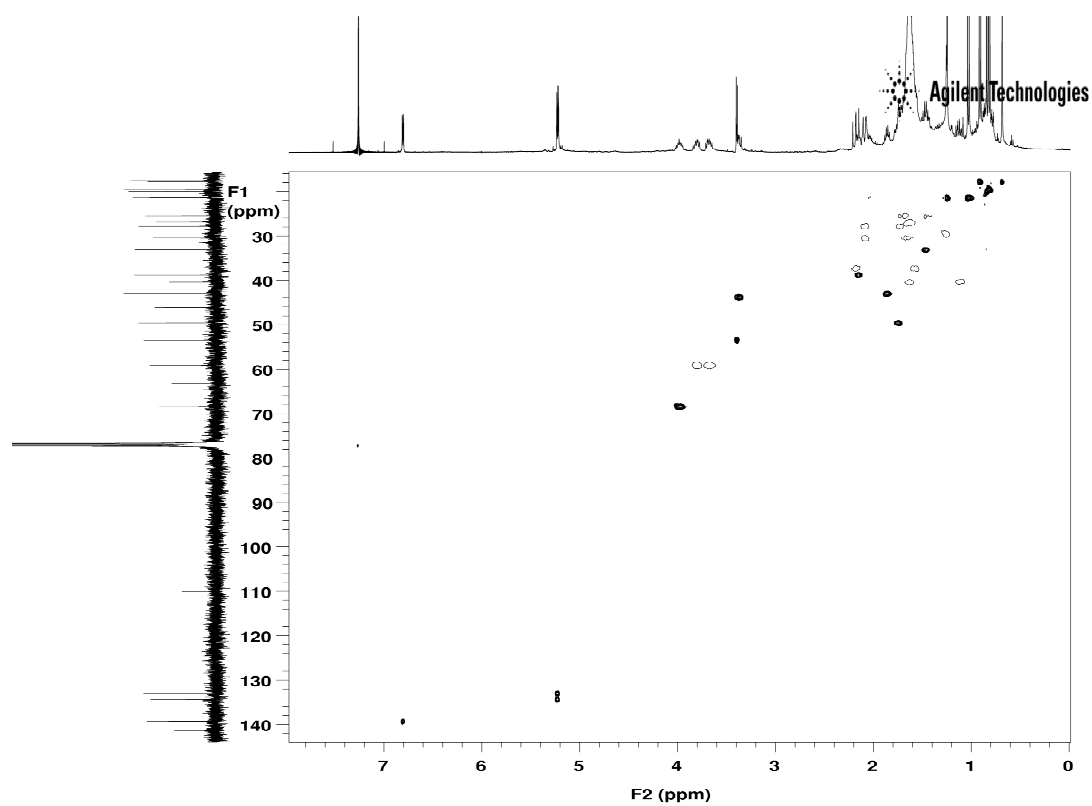

S4. gHSQC spectrum (400 MHz) of compound **1** in CDCl<sub>3</sub>.

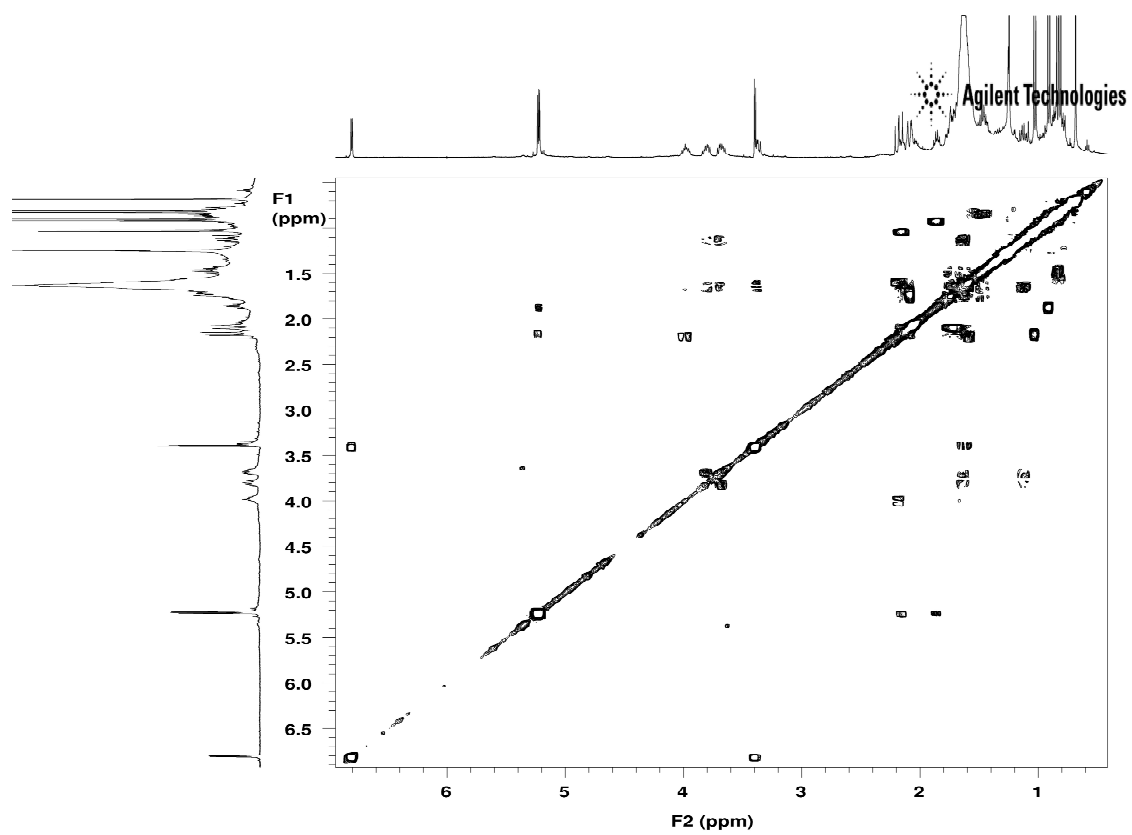

S5.  $^1\text{H}$ - $^1\text{H}$  COSY spectrum (400 MHz) of compound **1** in  $\text{CDCl}_3$ .

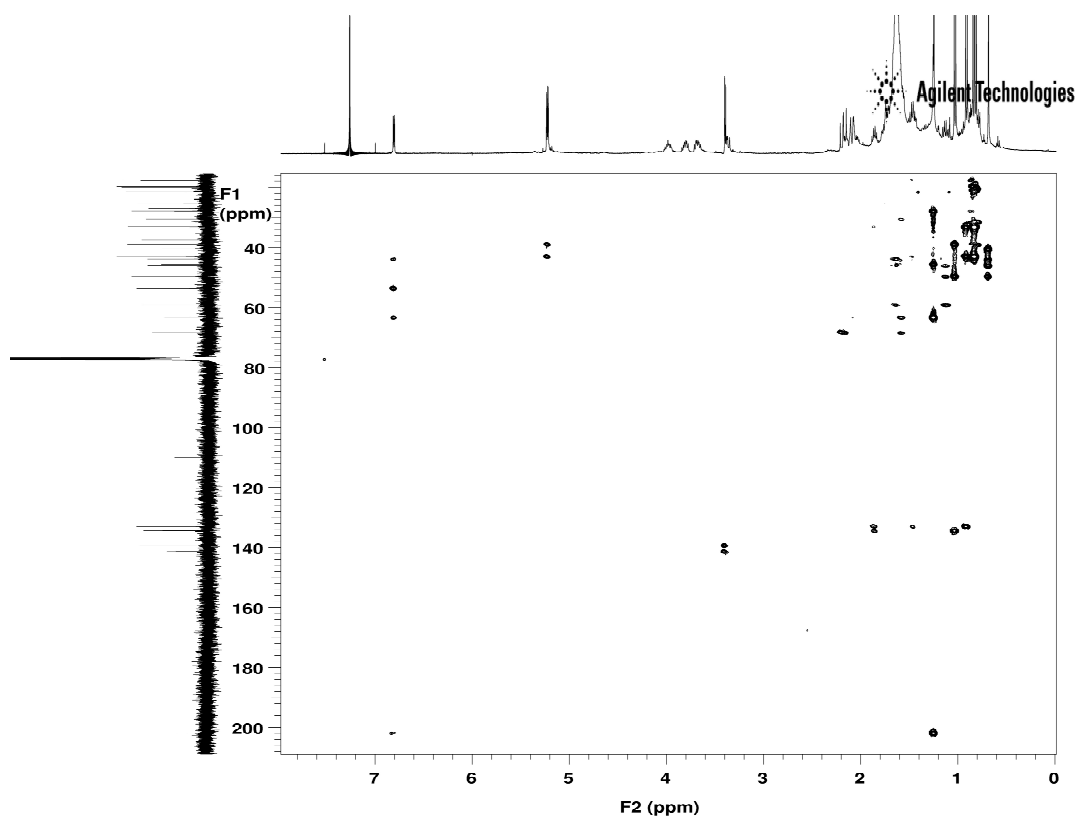

S6. gHMBC spectrum (400 MHz) of compound **1** in  $\text{CDCl}_3$ .

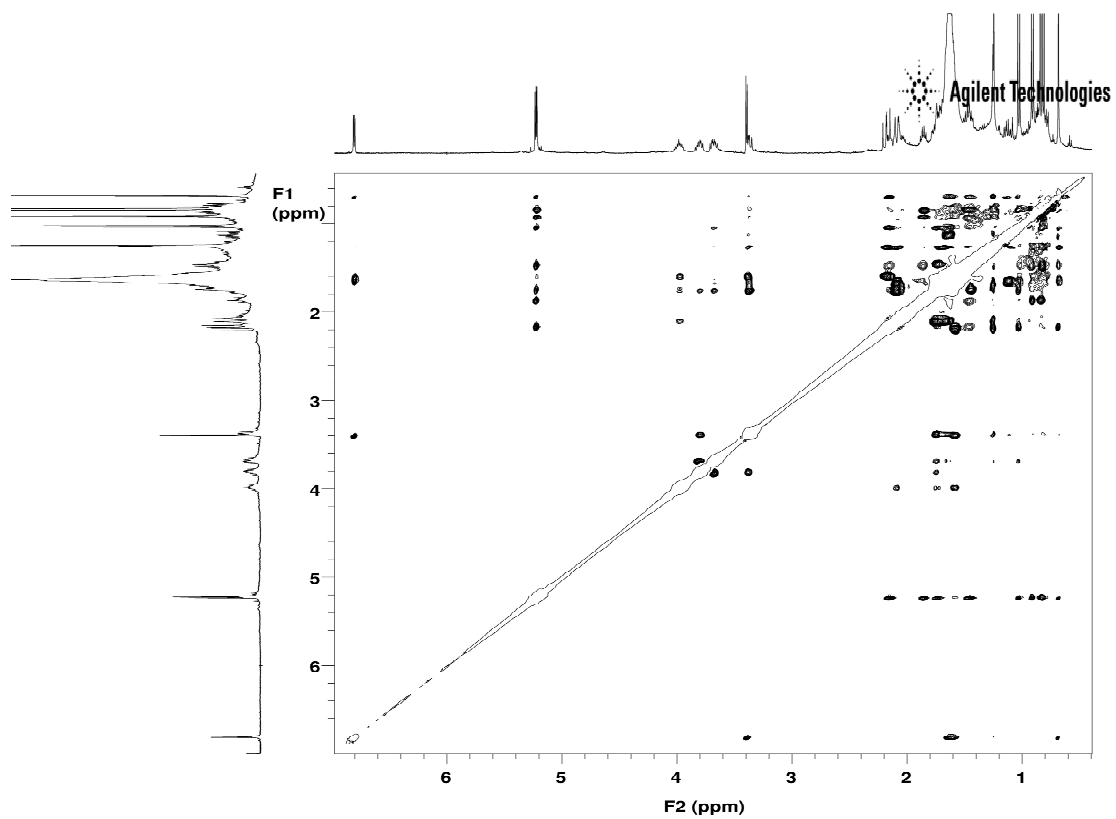

S7. NOESY spectrum (400 MHz) of compound **1** in CDCl<sub>3</sub>.

## Mass Spectrum SmartFormula Report

### Analysis Info

Analysis Name D:\Data\2\2012pineam030502041204\_000002.d  
Method broadband first signal  
Sample Name 2012PinEA-M03-05-02-04-12-04  
Comment ESI Positive

6/5/2014 3:22:02 PM

Instrument: FT-MS solarix

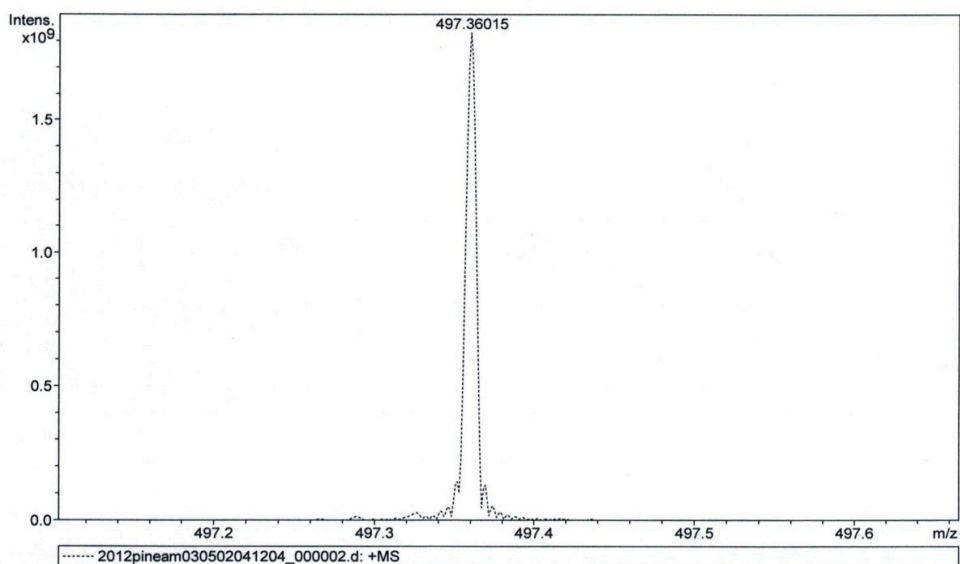

| Meas. m/z | # | Formula                                          | Score  | m/z       | err [mDa] | err [ppm] | mSigma | rdb | e <sup>-</sup> Conf | N-Rule |
|-----------|---|--------------------------------------------------|--------|-----------|-----------|-----------|--------|-----|---------------------|--------|
| 497.36015 | 1 | C <sub>30</sub> H <sub>50</sub> NaO <sub>4</sub> | 100.00 | 497.36013 | -0.02     | -0.03     | 13.5   | 5.5 | even                | ok     |

### S8. HRESIMS spectrum of compound 2.

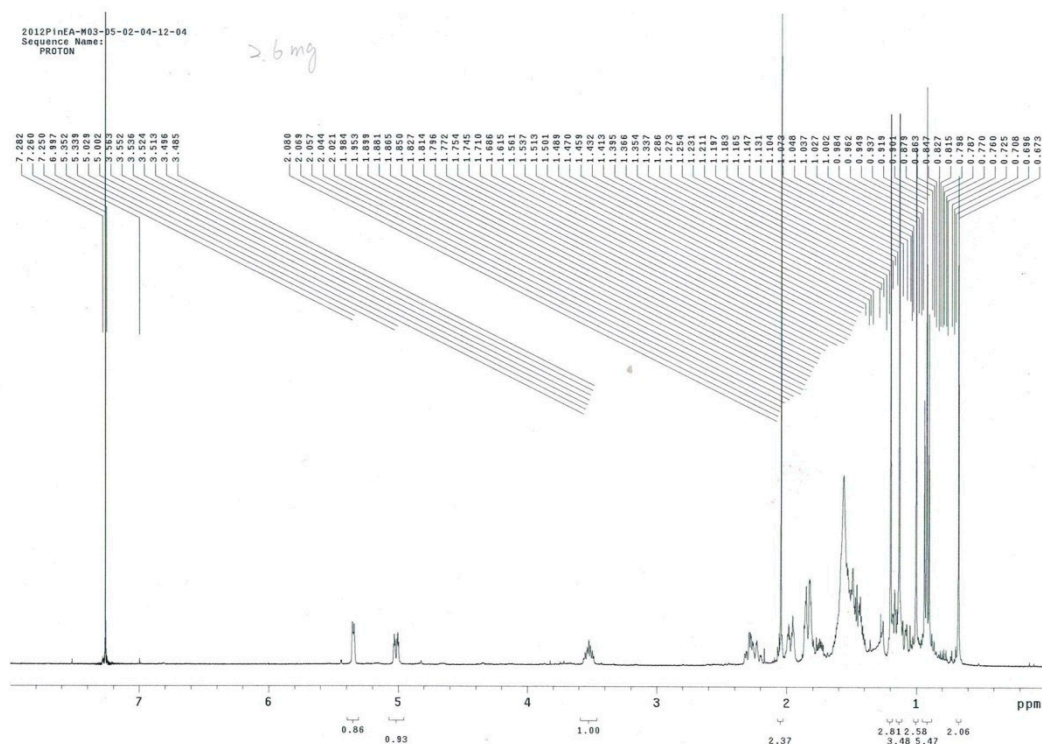

### S9. <sup>1</sup>H NMR spectrum (400 MHz) of compound 2 in CDCl<sub>3</sub>.



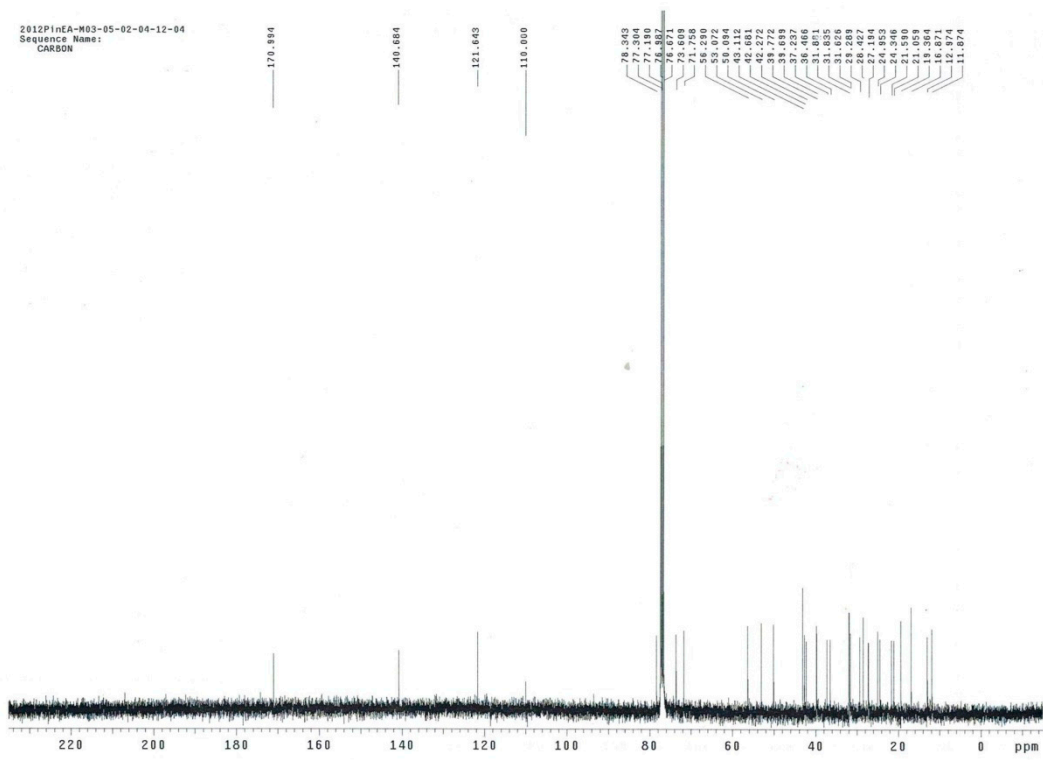

S10.  $^{13}\text{C}$  NMR spectrum (100 MHz) of compound **2** in  $\text{CDCl}_3$ .

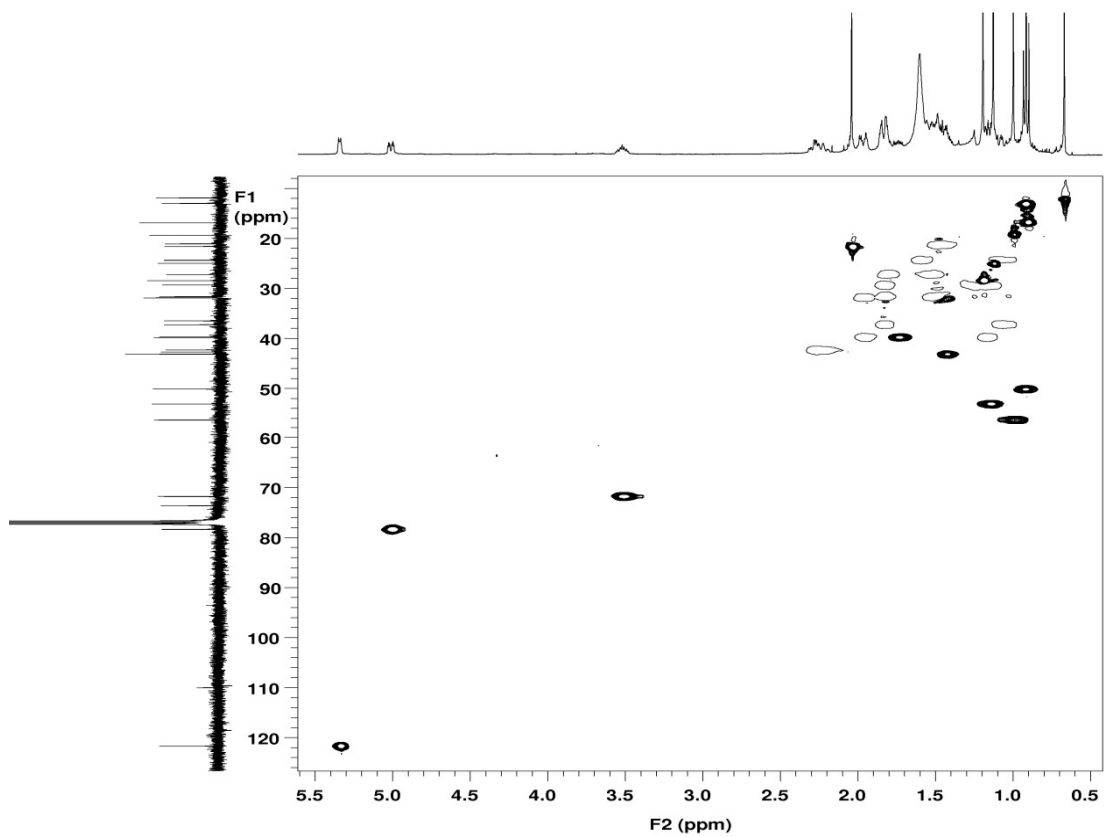

S11. gHSQC spectrum (400 MHz) of compound **2** in  $\text{CDCl}_3$ .

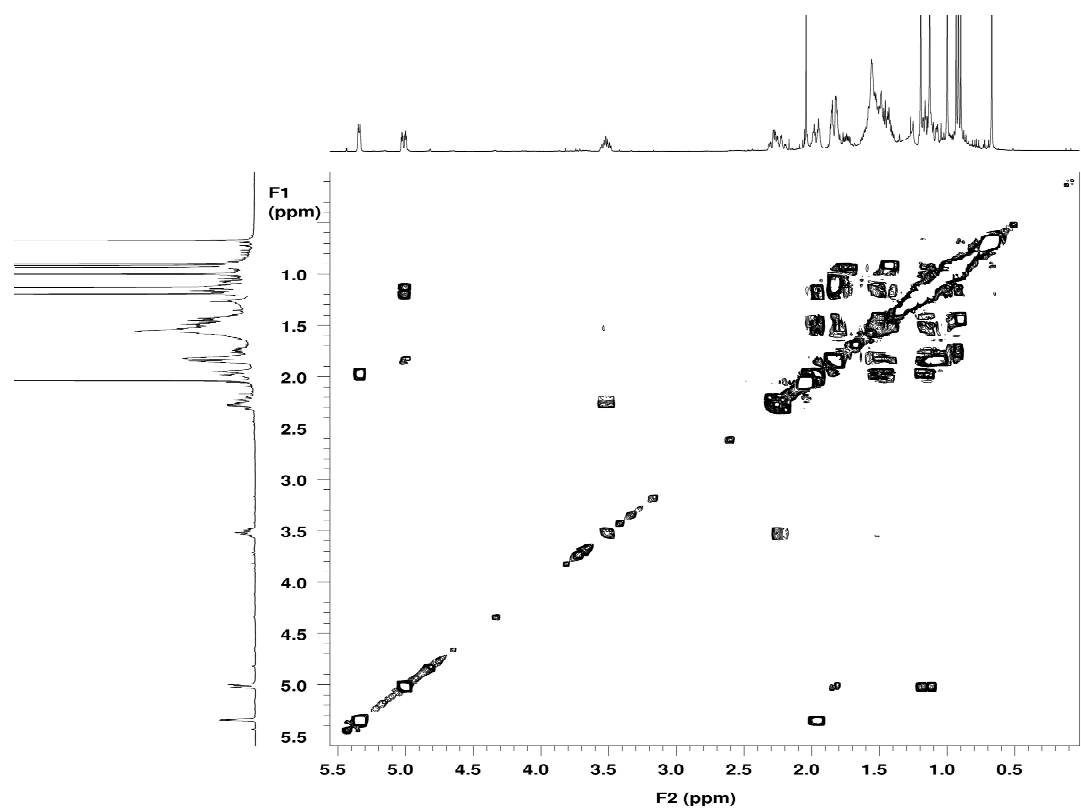

S12.  $^1\text{H}$ - $^1\text{H}$  COSY spectrum (400 MHz) of compound **2** in  $\text{CDCl}_3$ .

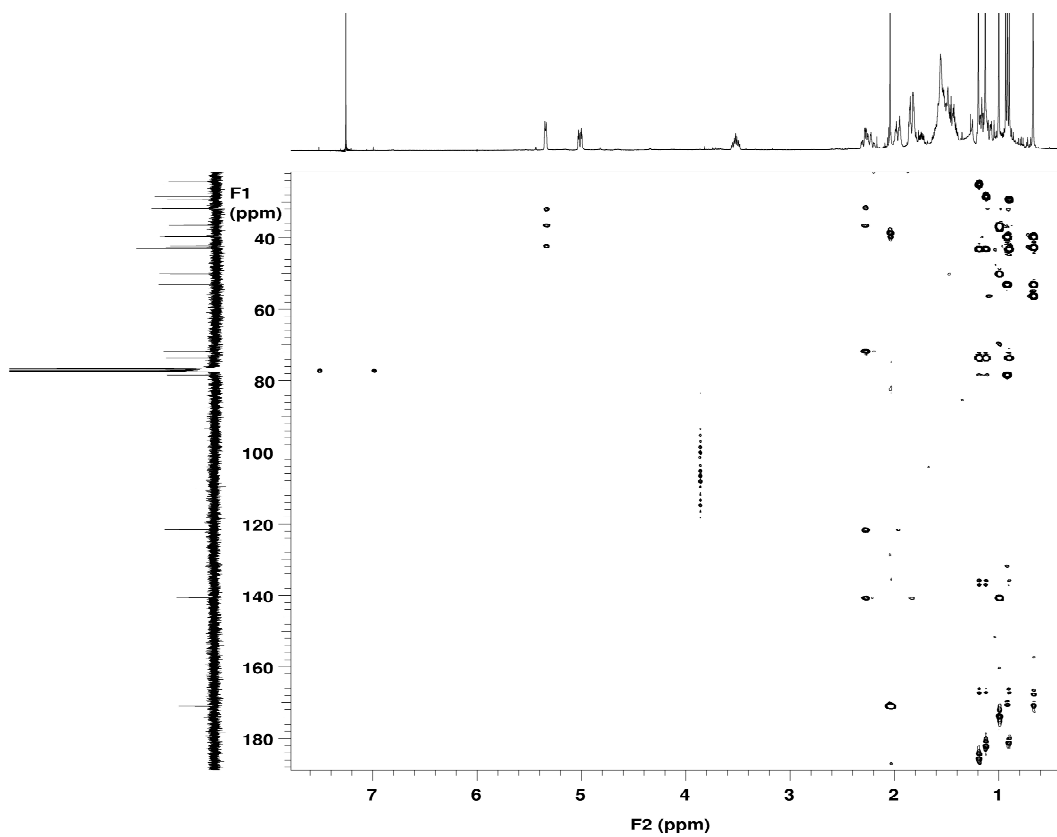

S13. gHMBC spectrum (400 MHz) of compound **2** in CDCl<sub>3</sub>.

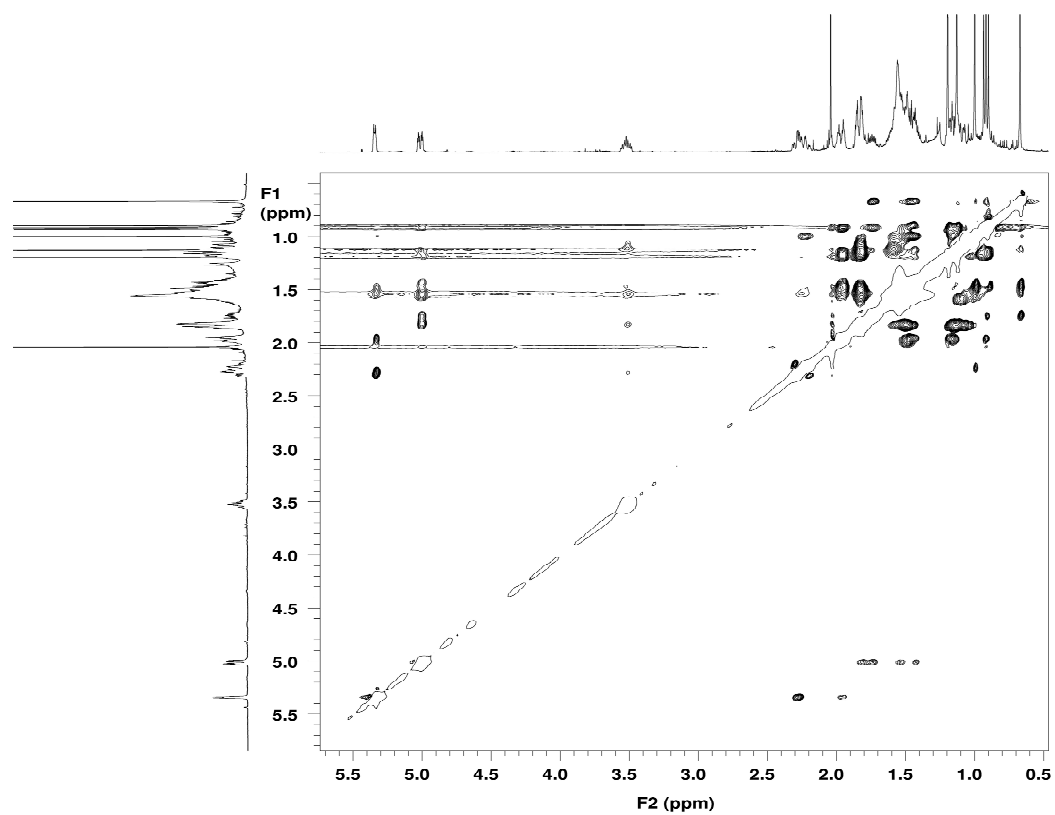

S14. NOESY spectrum (400 MHz) of compound **2** in CDCl<sub>3</sub>.
